# Supplementary material
Source: PubMed Central journal article supplement (PMC7117866)
Supplement: NIHMS1549480-supplement-Supplemental_Publication_Material.pdf [file NIHMS1549480-supplement-Supplemental_Publication_Material.pdf]

Supplemental Material: Bajaj NS et al. Coronary microvascular dysfunction, left ventricular remodeling and clinical outcomes in patients with chronic kidney impairment.

## **Contents**

### *Supplemental Methods*

Clinical outcomes

Statistical Analysis

Mediation analysis

### *Supplemental results*

Supplemental Figure 1

Supplemental Figure 2

Supplemental Table 1

Supplemental Table 2

Supplemental Table 3

Supplemental Table 4

Supplemental Table 5

Supplemental Table 6

Supplemental Table 7

## *Supplemental references*

### *Supplemental Methods*

#### Clinical outcomes

A Clinical Endpoints Committee (CEC) reviewed and adjudicated the primary composite endpoint (all cause deaths, non-fatal MI, and hospitalizations for heart failure). The members of CEC were blinded to image analyses. Time to first event defined as a composite of all cause death, and hospitalization for nonfatal MI or heart failure was analyzed. Ascertainment of clinical endpoints were determined by CEC from the longitudinal medical record, Partners Healthcare Research Patient Data Registry (RPDR), the National Death Index, mail surveys and telephone calls. Follow up was censored on December 31<sup>st</sup>, 2017. The RPDR is a centralized clinical data registry, or data warehouse, that gathers clinical information from various Partners hospital systems, the details can be found at <https://rc.partners.org/research-apps-and-services/identify-subjects-request-data#research-patient-data-registry>.

The definitions of individual outcomes are as below:

- Deaths: Ascertained from death certification, medical records, mail surveys and telephone calls.
- Non-fatal MI: 2012 Third Universal Definition of Myocardial Infarction was used to define Myocardial infarction.<sup>1</sup>
- Hospitalizations for heart failure (HF): Defined as an admission was defined by an event meeting all of the following criteria: admission to an inpatient unit or emergency department for at least 12 hours with a discharge diagnosis consistent with HF, at least one clinical manifestation of HF (i.e. dyspnea, orthopnea, paroxysmal nocturnal dyspnea, edema, pulmonary crackles or radiographic evidence of worsening HF), and additional or increased therapy for HF (initiation or increase of intravenous diuretics, inotropes or vasodilators or initiation of a medical or surgical intervention aimed at treating HF).

## Statistical Analysis

Stata software version 15.1 (StataCorp, College Station, Texas) and R (version 3.6.0) were used for analyses.

### *Baseline characteristic comparisons*

Differences in baseline characteristics among those with  $eGFR \geq 60$  versus those with  $eGFR < 60$  were compared by  $\chi^2$  tests for categorical and Mann-Whitney U test for continuous variables.

### *Modelling for myocardial function and outcomes*

#### Diastolic indices

Unadjusted and multivariable-adjusted associations between  $eGFR$  &  $CFR$ , diastolic indices (Lateral  $E/e'$  and Septal  $E/e'$ ) were evaluated using linear regression models using restricted cubic splines.  $N=279$  had information of Lateral  $E/e'$  and  $N=287$  had information on Medial  $E/e'$ . The multivariable models included demographic factors (age, sex, race) and clinical factors (history of hypertension, diabetes, peripheral vascular disease, stroke, diabetes,  $eGFR$ ,  $CFR$ , body mass index (BMI), LVMI and LVEF). The variables and number of knots were selected based on optimal values of the Akaike information criterion after including clinically important covariates. Three equally spaced knots were optimal for  $CFR$  and  $eGFR$ . The 3-dimensional scatter and surface plots were drawn using CAR and RGL package in R version 3.6.0. Those with missing data were excluded from fully adjusted models. The p-values from likelihood chi square test of significance of spline terms in the multivariate model were reported as p-trend. Correlation and partial correlations were also calculated.

#### Systolic indices

Unadjusted and multivariable-adjusted associations between  $eGFR$  &  $CFR$ , systolic indices (GLS, GRS and GCS) were evaluated using linear regression models using restricted cubic splines. GLS was available on 349, GRS on 287 and GCS on 290 patients respectively. The multivariable models included demographic factors (age, sex, race) and clinical factors (history of hypertension, diabetes, peripheral vascular disease, stroke, diabetes,  $eGFR$ ,  $CFR$ , body mass index (BMI), LVMI and LVEF). The variables and number of knots were selected based on optimal values of the Akaike information criterion after including clinically important covariates. Four equally spaced knots were optimal for  $CFR$  and three for  $eGFR$ . The 3-dimensional scatter and surface plots were plots

were drawn using CAR and RGL package in R version 3.6.0. Those with missing data were excluded from fully adjusted models. The p-values from likelihood chi square test of significance of spline terms in the multivariate model were reported as p-trend. Correlation and partial correlations were also calculated.

#### LV wall stress

Unadjusted and multivariable-adjusted associations between eGFR & CFR, circulating marker of LV wall stress (NTproBNP) were evaluated using linear regression models using restricted cubic splines. NTproBNP levels were available on 82 patients. NTproBNP levels were natural log transformed for this analysis. The multivariable models included demographic factors (age, sex, race) and clinical factors (history of hypertension, diabetes, peripheral vascular disease, stroke, diabetes, eGFR, CFR, body mass index (BMI), LVMI and LVEF). The variables and number of knots were selected based on optimal values of the Akaike information criterion after including clinically important covariates. Three equally spaced knots were optimal for CFR and eGFR. The 3-dimensional scatter and surface plots were drawn using CAR and RGL package in R version 3.6.0. Those with missing data were excluded from fully adjusted models. The p-values from likelihood chi square test of significance of spline terms in the multivariate model were reported as p-trend. Correlation and partial correlations were also calculated.

#### Adverse composite clinical endpoint (MACE)

Unadjusted and multivariable-adjusted associations between eGFR & CFR, and adverse composite clinical endpoint were evaluated using Poisson and Cox proportional hazard models while accounting for non-linearity of relationships using restricted cubic splines. The multivariable models included demographic factors (age, sex, race) and clinical factors (history of hypertension, diabetes, peripheral vascular disease, stroke, diabetes, eGFR, CFR, body mass index (BMI), LVMI and LVEF). We also tested for a statistical interaction between CFR and eGFR in the multivariate model. The variables and number of knots were selected based on optimal values of the Akaike information criterion after including clinically important covariates. Three equally spaced knots were optimal for CFR and eGFR. Those with missing data were excluded from fully adjusted models. The p-values from likelihood chi square test of significance of spline terms in the multivariate model were reported as p-trend.

Cox proportional hazard modelling to understand the effect of abnormal eGFR and CFR

Unadjusted and multivariable-adjusted Cox proportional hazards models were used to determine the effect of abnormal eGFR<sup>2</sup> (<60 ml/min/1.73m<sup>2</sup>) and severely abnormal CFR (<1.5). The multivariable models included demographic factors (age, sex, race) and clinical factors (history of hypertension, diabetes, peripheral vascular disease, stroke, diabetes, eGFR, CFR, body mass index (BMI), LVMI and LVEF). The cox proportional hazard (PH) assumptions test based on Schoenfeld residuals was used to verify non-violation of PH assumption in the adjusted model. We imputed values of LVMI and BMI using regression/conditional mean imputation and reanalyzed the data.

Interplay between LV structure, myocardial mechanics and coronary microvascular dysfunction on future outcomes

To understand the interplay between LV structure, myocardial mechanics and coronary microvascular dysfunction on future outcomes, we performed an exploratory analysis where we stratified patients by abnormal geometry, diastolic dysfunction ( $E/e' < 15$ ), systolic dysfunction (GLS < -17%) and CFR (<1.5) and compared the rate of adverse events using Poisson regression as well as a composite of heart failure admissions and non-fatal MI. The cutoffs for GLS were at median values in our cohort, whereas ASE definitions were used to define abnormal geometry<sup>3</sup>, cutoffs for  $E/e'$  and CFR were based on previous studies.<sup>4,5</sup> The groups compared were abnormal CFR and Abnormal geometry vs others, abnormal CFR and  $E/e' > 15$  vs others and abnormal CFR and GLS < -17% vs. others. The p-values are from adjusted Poisson models.

Mediation Analysis

Mediation analysis—which tests a putative causal relation among variables (i.e., a path)—was also performed to test whether renal function exerts its effect on cardiovascular disease via microvascular dysfunction. eGFR was chosen as measure of renal function

(exposure), CFR was chosen as marker of microvascular disease (mediator) whereas measures of diastolic/systolic function, NTproBNP and clinical composite endpoint were chosen as markers of cardiovascular disease (outcome).<sup>6</sup> All analyses were adjusted for demographic factors (age, sex, race) and clinical factors (history of hypertension, diabetes, peripheral vascular disease, stroke, diabetes, eGFR, CFR, body mass index (BMI), LVMI and LVEF). Linear regression and logistic regression models were used for continuous (E/e', GLS, GCS, radial strain and NTproBNP) and categorical outcomes (MACE) respectively.

We used medeff package in STATA to perform all analysis<sup>6</sup>. The following steps were followed:

**Step 1:** We fit models for the observed outcomes (measures of diastolic, systolic, LV wall stress and composite endpoint) mediator variable (CFR) and covariates (as above).

**Step 2:** We simulated model parameters from their sampling distribution (1000 simulations were performed).

**Step 3:** Repeated the following three steps for each draw of model parameters:

1. Simulated the potential values of the mediator.
2. Simulated the potential outcomes given the simulated values of the mediator.
3. Computed quantities of interest (Average causal mediated effect (ACME), Average direct effect (ADE), and average total effect).

**Step 4:** Computed summary statistics, i.e. point estimates (average) and confidence intervals.

Medeff package doesn't allow implementation of Cox model for mediation analysis hence for MACE outcome we used a med4way package in STATA<sup>7</sup> which allows for implementation of Cox model was for mediation analysis. The results for mediation analysis using both Cox and Logistic model are presented below in **Supplemental Table 6**.

*Supplementary results*

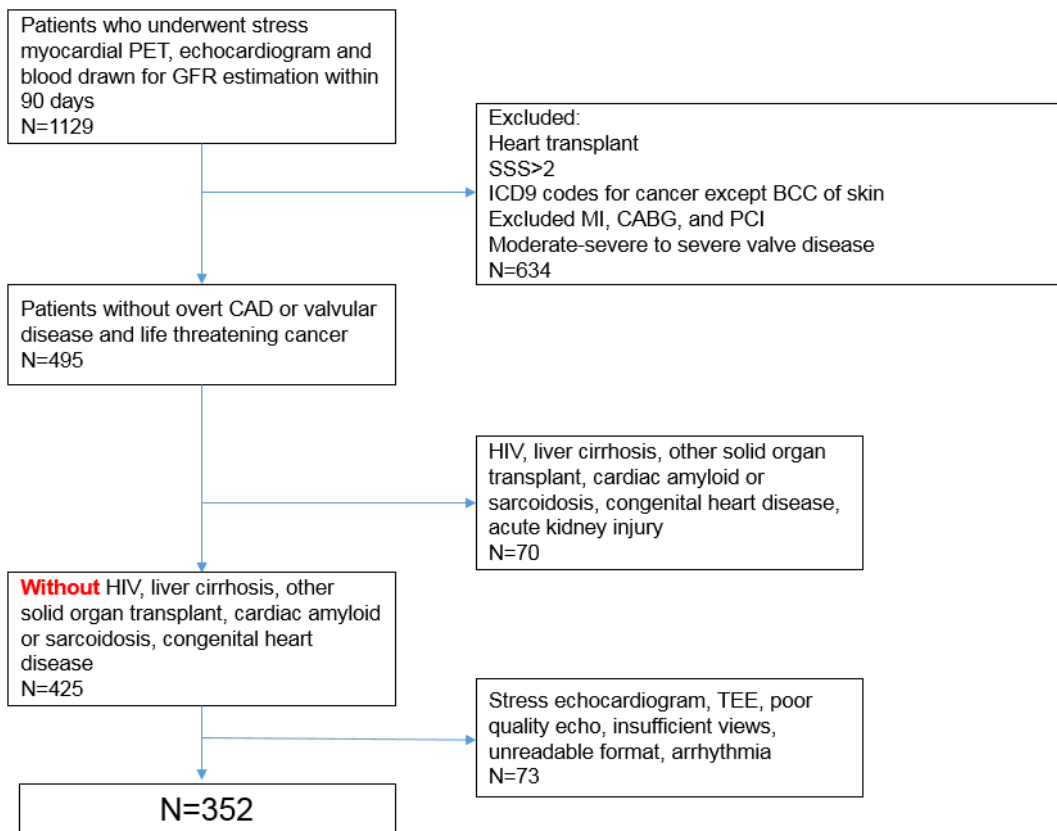

**Supplemental Figure 1:** Flow diagram describing selection of study cohort

PET= Positron emission tomography, SSS= summed stress score, ICD= International Classification of Diseases 9<sup>th</sup> Revision, BCC: Basal Cell Carcinoma, MI= myocardial infarction, PCI= percutaneous coronary intervention, CABG= Coronary artery bypass grafting, CAD= coronary artery disease, HIV= Human immunodeficiency virus, TEE= trans-esophageal echocardiogram

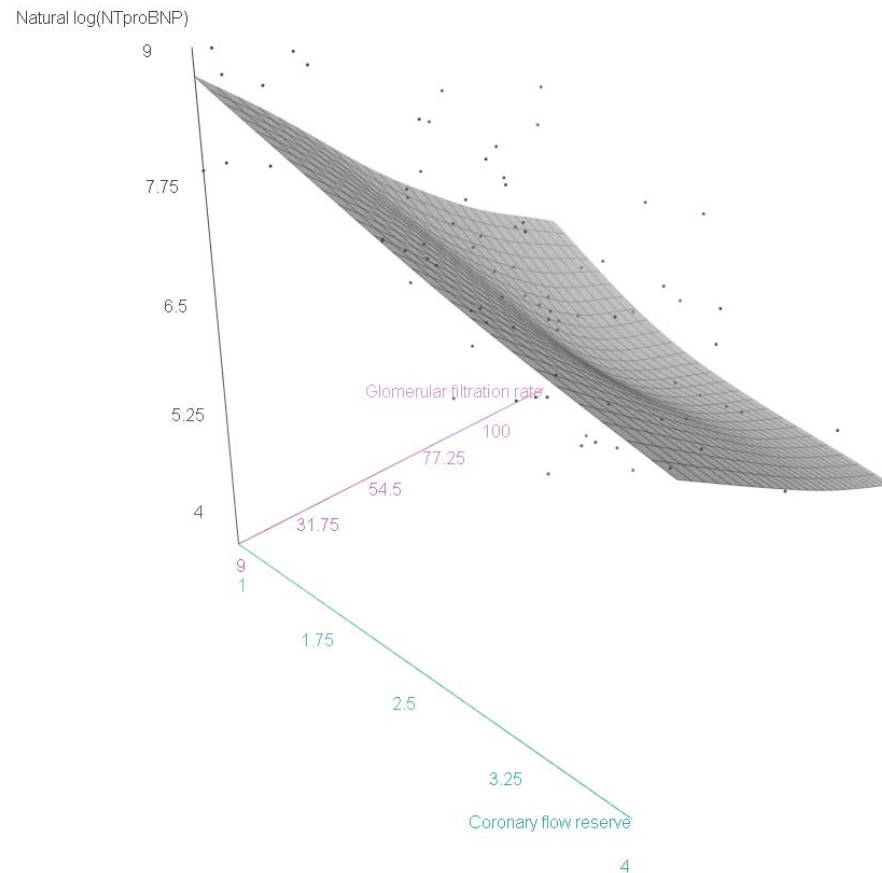

**Supplemental Figure 2:** Relationship between Natural LogNTproBNP, CFR and GFR using a restricted cubic spline linear regression (**Black grid on gray surface**).

Adjusted regression models included CFR=Coronary Flow Reserve, eGFR= estimated Glomerular Filtration, Age, Gender, Race, Hypertension, Hyperlipidemia, Diabetes, Peripheral vascular disease, Stroke, Left ventricular mass indexed and resting left ventricular ejection fraction

NTproBNP= N-terminal pro B-type natriuretic peptide



| <b>Supplemental Table 1:</b> Intraobserver and interobserver intraclass correlations for echocardiographic measurements. |                                     |                       |
|--------------------------------------------------------------------------------------------------------------------------|-------------------------------------|-----------------------|
| Echocardiographic Measurement                                                                                            | Intraclass correlation coefficients |                       |
|                                                                                                                          | Intra-observer (N=10)               | Inter-observer (N=10) |
| LVEF                                                                                                                     | 0.93                                | 0.84                  |
| E velocity                                                                                                               | 0.99                                | 0.97                  |
| Lateral e'                                                                                                               | 0.82                                | 0.92                  |
| Septal e'                                                                                                                | 0.86                                | 0.82                  |
| GLS                                                                                                                      | 0.94                                | 0.93                  |

Two readers and 10 targets.

| <b>Supplemental Table 2: STROBE Statement—checklist of items that should be included in reports of observational studies</b> |                 |                                                                                                                                                                                                                                                                                                                                                                                                                                                                        |                             |                                      |
|------------------------------------------------------------------------------------------------------------------------------|-----------------|------------------------------------------------------------------------------------------------------------------------------------------------------------------------------------------------------------------------------------------------------------------------------------------------------------------------------------------------------------------------------------------------------------------------------------------------------------------------|-----------------------------|--------------------------------------|
|                                                                                                                              | <b>Item No.</b> | <b>Recommendation</b>                                                                                                                                                                                                                                                                                                                                                                                                                                                  | <b>Page No.</b>             | <b>Relevant text from manuscript</b> |
| <b>Title and abstract</b>                                                                                                    | 1               | (a) Indicate the study's design with a commonly used term in the title or the abstract                                                                                                                                                                                                                                                                                                                                                                                 | 3                           | Abstract                             |
|                                                                                                                              |                 | (b) Provide in the abstract an informative and balanced summary of what was done and what was found                                                                                                                                                                                                                                                                                                                                                                    | 3                           | Abstract                             |
| <b>Introduction</b>                                                                                                          |                 |                                                                                                                                                                                                                                                                                                                                                                                                                                                                        |                             |                                      |
| Background/rationale                                                                                                         | 2               | Explain the scientific background and rationale for the investigation being reported                                                                                                                                                                                                                                                                                                                                                                                   | 5                           | Introduction                         |
| Objectives                                                                                                                   | 3               | State specific objectives, including any prespecified hypotheses                                                                                                                                                                                                                                                                                                                                                                                                       | 5                           | Introduction                         |
| <b>Methods</b>                                                                                                               |                 |                                                                                                                                                                                                                                                                                                                                                                                                                                                                        |                             |                                      |
| Study design                                                                                                                 | 4               | Present key elements of study design early in the paper                                                                                                                                                                                                                                                                                                                                                                                                                | 5-10, Supplement            | Methods                              |
| Setting                                                                                                                      | 5               | Describe the setting, locations, and relevant dates, including periods of recruitment, exposure, follow-up, and data collection                                                                                                                                                                                                                                                                                                                                        | 5-10                        | Methods                              |
| Participants                                                                                                                 | 6               | (a) <i>Cohort study</i> —Give the eligibility criteria, and the sources and methods of selection of participants. Describe methods of follow-up<br><i>Case-control study</i> —Give the eligibility criteria, and the sources and methods of case ascertainment and control selection. Give the rationale for the choice of cases and controls<br><i>Cross-sectional study</i> —Give the eligibility criteria, and the sources and methods of selection of participants | 5-10, Supplemental Figure 1 | Methods                              |
|                                                                                                                              |                 | (b) <i>Cohort study</i> —For matched studies, give matching criteria and number of exposed and unexposed<br><i>Case-control study</i> —For matched studies, give matching criteria and the number of controls per case                                                                                                                                                                                                                                                 | NA                          |                                      |

|                              |    |                                                                                                                                                                                      |                            |                        |
|------------------------------|----|--------------------------------------------------------------------------------------------------------------------------------------------------------------------------------------|----------------------------|------------------------|
| Variables                    | 7  | Clearly define all outcomes, exposures, predictors, potential confounders, and effect modifiers. Give diagnostic criteria, if applicable                                             | 8 and Supplemental methods | Methods                |
| Data sources/<br>measurement | 8* | For each variable of interest, give sources of data and details of methods of assessment (measurement). Describe comparability of assessment methods if there is more than one group | 5-10                       | <i>Methods</i>         |
| Bias                         | 9  | Describe any efforts to address potential sources of bias                                                                                                                            | 5-10                       | Methods                |
| Study size                   | 10 | Explain how the study size was arrived at                                                                                                                                            | Supplemental Figure 1      | Methods and supplement |

Continued on next page

|                        |     |                                                                                                                                                                                                                                                                                                           |                                |                        |
|------------------------|-----|-----------------------------------------------------------------------------------------------------------------------------------------------------------------------------------------------------------------------------------------------------------------------------------------------------------|--------------------------------|------------------------|
| Quantitative variables | 11  | Explain how quantitative variables were handled in the analyses. If applicable, describe which groupings were chosen and why                                                                                                                                                                              | 5-10                           | Methods                |
| Statistical methods    | 12  | (a) Describe all statistical methods, including those used to control for confounding                                                                                                                                                                                                                     | 5-10 and Supplemental methods  | Methods and Supplement |
|                        |     | (b) Describe any methods used to examine subgroups and interactions                                                                                                                                                                                                                                       | 5-10 and Supplemental methods  | Methods and Supplement |
|                        |     | (c) Explain how missing data were addressed                                                                                                                                                                                                                                                               | 5-10 and Supplemental methods  | Methods and Supplement |
|                        |     | (d) <i>Cohort study</i> —If applicable, explain how loss to follow-up was addressed<br><i>Case-control study</i> —If applicable, explain how matching of cases and controls was addressed<br><i>Cross-sectional study</i> —If applicable, describe analytical methods taking account of sampling strategy | 5-10 and Supplemental methods  | Methods and Supplement |
|                        |     | (e) Describe any sensitivity analyses                                                                                                                                                                                                                                                                     | 5-10<br>Methods and Supplement | Methods and Supplement |
| <b>Results</b>         |     |                                                                                                                                                                                                                                                                                                           |                                |                        |
| Participants           | 13* | (a) Report numbers of individuals at each stage of study—eg numbers potentially eligible, examined for eligibility, confirmed eligible, included in the study, completing follow-up, and analysed                                                                                                         | Supplemental Figure 1          | Supplement             |
|                        |     | (b) Give reasons for non-participation at each stage                                                                                                                                                                                                                                                      | Supplemental Figure 1          | Supplement             |
|                        |     | (c) Consider use of a flow diagram                                                                                                                                                                                                                                                                        | Supplemental Figure 1          | Supplement             |
| Descriptive data       | 14* | (a) Give characteristics of study participants (eg demographic, clinical, social) and information on exposures and potential confounders                                                                                                                                                                  | Table 1                        | Results                |
|                        |     | (b) Indicate number of participants with missing data for each variable of interest                                                                                                                                                                                                                       | Supplemental Table 5           | Supplement             |

|              |     |                                                                                                                                                                                                              |                  |                     |
|--------------|-----|--------------------------------------------------------------------------------------------------------------------------------------------------------------------------------------------------------------|------------------|---------------------|
|              |     | (c) <i>Cohort study</i> —Summarise follow-up time (eg, average and total amount)                                                                                                                             | Table 2          | Results             |
| Outcome data | 15* | <i>Cohort study</i> —Report numbers of outcome events or summary measures over time                                                                                                                          | Table 2          | Results             |
|              |     | <i>Case-control study</i> —Report numbers in each exposure category, or summary measures of exposure                                                                                                         |                  |                     |
|              |     | <i>Cross-sectional study</i> —Report numbers of outcome events or summary measures                                                                                                                           |                  |                     |
| Main results | 16  | (a) Give unadjusted estimates and, if applicable, confounder-adjusted estimates and their precision (eg, 95% confidence interval). Make clear which confounders were adjusted for and why they were included | 5-10             | Methods and Results |
|              |     | (b) Report category boundaries when continuous variables were categorized                                                                                                                                    | 10-13            | Results             |
|              |     | (c) If relevant, consider translating estimates of relative risk into absolute risk for a meaningful time period                                                                                             | 10-13 and Tables | Results             |

Continued on next page

|                          |    |                                                                                                                                                                            |       |                    |
|--------------------------|----|----------------------------------------------------------------------------------------------------------------------------------------------------------------------------|-------|--------------------|
| Other analyses           | 17 | Report other analyses done—eg analyses of subgroups and interactions, and sensitivity analyses                                                                             | 10-13 | Results            |
| <b>Discussion</b>        |    |                                                                                                                                                                            |       |                    |
| Key results              | 18 | Summarise key results with reference to study objectives                                                                                                                   | 13-15 | Discussion         |
| Limitations              | 19 | Discuss limitations of the study, taking into account sources of potential bias or imprecision. Discuss both direction and magnitude of any potential bias                 | 13-15 | Discussion         |
| Interpretation           | 20 | Give a cautious overall interpretation of results considering objectives, limitations, multiplicity of analyses, results from similar studies, and other relevant evidence | 13-15 | Discussion         |
| Generalisability         | 21 | Discuss the generalisability (external validity) of the study results                                                                                                      | 13-15 | Discussion         |
| <b>Other information</b> |    |                                                                                                                                                                            |       |                    |
| Funding                  | 22 | Give the source of funding and the role of the funders for the present study and, if applicable, for the original study on which the present article is based              | 2-4   | Title and Abstract |

\*Give information separately for cases and controls in case-control studies and, if applicable, for exposed and unexposed groups in cohort and cross-sectional studies.

**Note:** An Explanation and Elaboration article discusses each checklist item and gives methodological background and published examples of transparent reporting. The STROBE checklist is best used in conjunction with this article (freely available on the Web sites of PLoS Medicine at <http://www.plosmedicine.org/>, Annals of Internal Medicine at <http://www.annals.org/>, and Epidemiology at <http://www.epidem.com/>). Information on the STROBE Initiative is available at [www.strobe-statement.org](http://www.strobe-statement.org).

| <b>Supplemental Table 3:</b> Association between eGFR and CFR in models without and with CCB use |                                                      |                             |                  |
|--------------------------------------------------------------------------------------------------|------------------------------------------------------|-----------------------------|------------------|
|                                                                                                  | Correlation coefficient for eGFR and CFR association | Unadjusted p-value in model | Adjusted p-value |
| Model 1 (Unadjusted association)                                                                 | 0.2604                                               | <0.001                      | -                |
| Model 2 (Model 1 + CCB Use)                                                                      | 0.2596*                                              | -                           | <0.001           |
| Model 3 (Model 1 + Confounders)                                                                  | 0.1205*                                              | -                           | 0.0317           |
| Model 4 (Model 1 + Confounders+ CCB use)                                                         | 0.1258*                                              | -                           | 0.0251           |

Confounders included: age, gender, race, hypertension, hyperlipidemia, diabetes, peripheral vascular disease, stroke, left ventricular mass indexed and left ventricular ejection fraction. \*Partial correlation coefficients after accounting for confounders.

| <b>Supplemental Table 4: Associations between LV mechanics, renal function and coronary flow reserve in diabetics</b> |                             |                         |                     |                   |                              |                         |                     |                   |
|-----------------------------------------------------------------------------------------------------------------------|-----------------------------|-------------------------|---------------------|-------------------|------------------------------|-------------------------|---------------------|-------------------|
| <b>Measure</b>                                                                                                        | <b>Association with CFR</b> |                         |                     |                   | <b>Association with eGFR</b> |                         |                     |                   |
|                                                                                                                       | Shape                       | Correlation Coefficient | Unadjusted, p-value | Adjusted, p-value | Shape                        | Correlation Coefficient | Unadjusted, p-value | Adjusted, p-value |
| <b>Diastolic indices</b>                                                                                              |                             |                         |                     |                   |                              |                         |                     |                   |
| Lateral E/e'                                                                                                          | L-shaped                    | -0.38                   | <0.001              | 0.005             | L-shaped                     | -0.34                   | 0.001               | 0.251             |
| Septal E/e'                                                                                                           | L-shaped                    | -0.39                   | <0.001              | 0.017             | L-shaped                     | -0.29                   | 0.002               | 0.063             |
| <b>Systolic indices</b>                                                                                               |                             |                         |                     |                   |                              |                         |                     |                   |
| GLS                                                                                                                   | Reverse sigmoid             | -0.57                   | <0.001              | 0.001             | Linear                       | -0.30                   | 0.001               | 0.162             |
| GRS                                                                                                                   | Sigmoid                     | 0.29                    | <0.001              | 0.001             | Linear                       | 0.20                    | 0.002               | 0.250             |
| GCS                                                                                                                   | Reverse sigmoid             | -0.42                   | <0.001              | 0.001             | Linear                       | -0.29                   | 0.001               | 0.584             |

Adjusted regression models included CFR, eGFR, age, gender, race, hypertension, hyperlipidemia, peripheral vascular disease, stroke, left ventricular mass indexed and left ventricular ejection fraction. For continuous outcomes (Lateral E/e', Septal E/e', GLS, GRS, GCS and Natural log NTproBNP linear regression restricted spline models were used) whereas for MACE Poisson regression restricted cubic spline models were used)



| <b>Supplemental table 5: Comparison of models without and with imputation.</b> |                  |                            |                  |
|--------------------------------------------------------------------------------|------------------|----------------------------|------------------|
| <b>Current model, N=327</b>                                                    |                  | <b>Imputed data, N=352</b> |                  |
| <b>CFR <math>\geq</math>1.5 vs. CFR&lt;1.5</b>                                 |                  |                            |                  |
| Unadjusted HR                                                                  | Adjusted HR      | Unadjusted HR              | Adjusted HR      |
| 2.02 (1.36-2.98)                                                               | 1.61 (1.05-2.46) | 2.13 (1.46-3.11)           | 1.66 (1.09-2.52) |
| <b>eGFR <math>\geq</math>60 vs. eGFR&lt;60</b>                                 |                  |                            |                  |
| Unadjusted HR                                                                  | Adjusted HR      | Unadjusted HR              | Adjusted HR      |
| 2.43 (1.64-3.31)                                                               | 1.29 (0.82-2.04) | 2.55 (1.73-3.75)           | 1.36 (0.87-2.10) |

| <b>Supplemental table 6: Frequency of missing data</b> |                            |                      |          |          |                  |
|--------------------------------------------------------|----------------------------|----------------------|----------|----------|------------------|
| Variable                                               | Outcome/Dependent variable | Confounder/Covariate | Mediator | Exposure | Number available |
| eGFR                                                   | No                         | No                   | No       | Yes      | 352/352          |
| CFR                                                    | No                         | No                   | Yes      | No       | 352/352          |
| GLS                                                    | Yes                        | No                   | No       | No       | 349/352          |
| GRS                                                    | Yes                        | No                   | No       | No       | 287/352          |
| GCS                                                    | Yes                        | No                   | No       | No       | 290/352          |
| Lateral E/e'                                           | Yes                        | No                   | No       | No       | 279/352          |
| Septal E/e'                                            | Yes                        | No                   | No       | No       | 287/352          |
| NTproBNP                                               | Yes                        | No                   | No       | No       | 82/352           |
| MACE                                                   | Yes                        | No                   | No       | No       | 352/352          |
| Age                                                    | No                         | Yes                  | No       | No       | 352/352          |
| Gender                                                 | No                         | Yes                  | No       | No       | 352/352          |
| Race                                                   | No                         | Yes                  | No       | No       | 352/352          |
| Hypertension                                           | No                         | Yes                  | No       | No       | 352/352          |
| Hyperlipidemia                                         | No                         | Yes                  | No       | No       | 352/352          |
| Diabetes                                               | No                         | Yes                  | No       | No       | 352/352          |
| PAD                                                    | No                         | Yes                  | No       | No       | 352/352          |
| Stroke                                                 | No                         | Yes                  | No       | No       | 352/352          |
| LVEF                                                   | No                         | Yes                  | No       | No       | 351/352          |
| LVMI                                                   | No                         | Yes                  | No       | No       | 328/352          |
| BMI                                                    | No                         | Yes                  | No       | No       | 350/352          |

| <b>Supplemental Table 7: Mediation analysis (Logistic vs. Cox model)</b>       |                                                                                 |                                  |
|--------------------------------------------------------------------------------|---------------------------------------------------------------------------------|----------------------------------|
| <b>Adverse cardiovascular event using Logistic model in mediation analysis</b> |                                                                                 |                                  |
|                                                                                | <b>Standardized Regression coefficients for CFR in mediation model, p-value</b> | <b>% effect mediated via CFR</b> |
| Composite clinical endpoint (MACE)                                             | -0.32, 0.039                                                                    | 14%                              |
| <b>Adverse cardiovascular event using Cox model in mediation analysis</b>      |                                                                                 |                                  |
| Composite clinical endpoint (MACE)                                             | -0.30, 0.026                                                                    | 32%                              |

Results for Mediation model for hypothesized pathway via microvascular dysfunction to adverse cardiovascular event in chronic kidney disease

### *Supplemental References*

1. Thygesen K, Alpert JS, Jaffe AS, Simoons ML, Chaitman BR, White HD, Katus HA, Lindahl B, Morrow DA, Clemmensen PM, Johanson P, Hod H, Underwood R, Bax JJ, Bonow RO, Pinto F, Gibbons RJ, Fox KA, Atar D, Newby LK, Galvani M, Hamm CW, Uretsky BF, Steg PG, Wijns W, Bassand JP, Menasche P, Ravkilde J, Ohman EM, Antman EM, Wallentin LC, Armstrong PW, Simoons ML, Januzzi JL, Nieminen MS, Gheorghide M, Filippatos G, Luepker RV, Fortmann SP, Rosamond WD, Levy D, Wood D, Smith SC, Hu D, Lopez-Sendon JL, Robertson RM, Weaver D, Tendera M, Bove AA, Parkhomenko AN, Vasilieva EJ and Mendis S. Third universal definition of myocardial infarction. *Circulation*. 2012;126:2020-35.
2. Levey AS, Eckardt KU, Tsukamoto Y, Levin A, Coresh J, Rossert J, De Zeeuw D, Hostetter TH, Lameire N and Eknoyan G. Definition and classification of chronic kidney disease: a position statement from Kidney Disease: Improving Global Outcomes (KDIGO). *Kidney international*. 2005;67:2089-100.
3. Lang RM, Bierig M, Devereux RB, Flachskampf FA, Foster E, Pellikka PA, Picard MH, Roman MJ, Seward J, Shanewise JS, Solomon SD, Spencer KT, Sutton MS and Stewart WJ. Recommendations for chamber quantification: a report from the American Society of Echocardiography's Guidelines and Standards Committee and the Chamber Quantification Writing Group, developed in conjunction with the European Association of Echocardiography, a branch of the European Society of Cardiology. *Journal of the American Society of Echocardiography : official publication of the American Society of Echocardiography*. 2005;18:1440-63.
4. Taqueti VR, Solomon SD, Shah AM, Desai AS, Groarke JD, Osborne MT, Hainer J, Bibbo CF, Dorbala S, Blankstein R and Di Carli MF. Coronary microvascular dysfunction and future risk of heart failure with preserved ejection fraction. *European heart journal*. 2018;39:840-849.
5. Murthy VL, Naya M, Foster CR, Hainer J, Gaber M, Di Carli G, Blankstein R, Dorbala S, Sitek A, Pencina MJ and Di Carli MF. Improved cardiac risk assessment with noninvasive measures of coronary flow reserve. *Circulation*. 2011;124:2215-24.
6. Hicks R and Tingley D. Causal Mediation Analysis. *The Stata Journal*. 2012;11:605-619.
7. Discacciati A, Bellavia A, Lee JJ, Mazumdar M and Valeri L. Med4way: a Stata command to investigate mediating and interactive mechanisms using the four-way effect decomposition. *International journal of epidemiology*. 2018.
